# Supplementary material for: Optimization of Quantitative PCR Methods for Enteropathogen Detection
Source: PubMed Central journal article supplement (PMC4918952; doi:10.1371/journal.pone.0158199), 2016-06-23
Supplement: pone.0158199.s002.pdf [file pone.0158199.s002.pdf]

S2 Table. List of genomic material included in the specificity testing of all the assays.

| Organism                            | Genomic material                                                                                                                                                                           |
|-------------------------------------|--------------------------------------------------------------------------------------------------------------------------------------------------------------------------------------------|
| Adenovirus                          | Adenovirus 1 (ATCC VR-1D)<br>Adenovirus 5 (ATCC VR-5D)<br>Adenovirus 40 (ATCC VR-931D)<br>Adenovirus 41 (ATCC VR-930D)                                                                     |
| <i>Aeromonas</i> spp                | <i>Aeromonas hydrophila</i> (ATCC7965 and 7966)<br><i>Aeromonas caviae</i> (ATCC 15468)<br><i>Aeromonas veronii</i> (ATCC 35624)                                                           |
| <i>Ancylostoma duodenale</i>        | Amplicon                                                                                                                                                                                   |
| <i>Ascaris lumbricoides</i>         | Amplicon                                                                                                                                                                                   |
| Astrovirus                          | IVT RNA                                                                                                                                                                                    |
| <i>Bacteriodes fragilis</i>         | <i>Bacteriodes fragilis</i> (ATCC 25858)<br><i>Bacteriodes fragilis</i> (ATCC 43858)                                                                                                       |
| <i>Blastocystis</i> spp             | <i>Blastocystis hominis</i> (ATCC 50608D)                                                                                                                                                  |
| <i>Clostridium difficile</i>        | Clinical isolate                                                                                                                                                                           |
| <i>Campylobacter</i> spp            | <i>Campylobacter coli</i> (ATCC 43473)<br><i>Campylobacter jejuni</i> (ATCC 33291)<br><i>Campylobacter hyointestinalis</i> (ATCC 35217)<br><i>Campylobacter upsalensis</i> (ATCC BAA-1059) |
| <i>Cryptosporidium</i> spp          | <i>Cryptosporidium hominis</i> isolate TU502 (NR-2520)<br><i>Cryptosporidium meleagridis</i> isolate TU1867 (NR-2521)<br><i>Cryptosporidium parvum</i> (Waterborne Inc)                    |
| <i>Cyclospora cayetanensis</i>      | Amplicon                                                                                                                                                                                   |
| <i>Cystoisospora belli</i>          | Amplicon                                                                                                                                                                                   |
| Cytomegalovirus                     | HCMV strain AD-169 (ATCC VR-538D)                                                                                                                                                          |
| Ebola virus                         | Zaire Ebola virus (NR-31806)                                                                                                                                                               |
| <i>Encephalitozoon intestinalis</i> | <i>Encephalitozoon intestinalis</i> (Waterborne Inc)                                                                                                                                       |
| <i>Entamoeba</i> spp                | <i>Entamoeba dispar</i> (clinical isolate)<br><i>Entamoeba bangladeshi</i> (clinical isolate)<br><i>Entamoeba histolytica</i> HM1<br><i>Entamoeba moshkovskii</i> (clinical isolate)       |
| <i>Enterocytozoon bieneusi</i>      | Amplicon                                                                                                                                                                                   |
| Enterovirus                         | Enterovirus 71 (NR-4961)                                                                                                                                                                   |
| Epstein-Barr virus                  | EBV infected HCC2157BL (ATCC CRL-2341D)                                                                                                                                                    |
| <i>Escherichia coli</i>             | EAEC O42, EAEC JM221, EAEC 144-1-1, EAEC HS, EAEC495-1<br>EHEC O157:H7<br>EIEC O124<br>EPEC O127:H6 E2348/69<br>ETEC H10407                                                                |
| <i>Giardia lamblia</i>              | <i>Giardia lamblia</i> assemblage A<br><i>Giardia lamblia</i> assemblage B                                                                                                                 |
| <i>Helicobacter pylori</i>          | <i>Helicobacter pylori</i> (ATCC 43504)                                                                                                                                                    |
| Human herpesvirus 6                 | Amplicon                                                                                                                                                                                   |
| Human herpesvirus 7                 | Amplicon                                                                                                                                                                                   |
| <i>Listeria monocytogenes</i>       | <i>Listeria monocytogenes</i> strain J0161 (NR-13342)                                                                                                                                      |
| MS2                                 | MS2 (ATCC 15597-B1)                                                                                                                                                                        |
| <i>Mycobacterium tuberculosis</i>   | <i>Mycobacterium tuberculosis</i> H37RV                                                                                                                                                    |
| <i>Necator americanus</i>           | Amplicon                                                                                                                                                                                   |
| Norovirus GI                        | IVT RNA                                                                                                                                                                                    |
| Norovirus GII                       | IVT RNA                                                                                                                                                                                    |
| PhHV                                | PhHV                                                                                                                                                                                       |
| <i>Plesiomonas shigelloides</i>     | <i>Plesiomonas shigelloides</i> (ATCC 51903D)                                                                                                                                              |
| Rotarix                             | IVT RNA                                                                                                                                                                                    |
| RotaTeq                             | IVT RNA                                                                                                                                                                                    |
| Rotavirus                           | Rotavirus G1P[8] wa<br>Rotavirus G2P[4] DS-1                                                                                                                                               |
| <i>Salmonella enterica</i>          | <i>Salmonella enterica</i> serovar collection ( <i>Salmonella</i> Reference Collection B)                                                                                                  |
| Sapovirus                           | IVT RNA, clinical samples                                                                                                                                                                  |
| <i>Schistosoma mansoni</i>          | <i>Schistosoma mansoni</i> strain NMRI (NR-28910)                                                                                                                                          |
| <i>Shigella</i> spp                 | <i>Shigella boydii</i> (clinical isolate)<br><i>Shigella dysenteriae</i> (clinical isolate)<br><i>Shigella flexneri</i> (clinical isolate)<br><i>Shigella sonnei</i> (clinical isolate)    |
| <i>Strongyloides stercoralis</i>    | Amplicon                                                                                                                                                                                   |
| <i>Trichuris trichuria</i>          | Amplicon                                                                                                                                                                                   |
| <i>Vibrio cholerae</i>              | <i>Vibrio cholerae</i> (ATCC 9458 and 582)                                                                                                                                                 |
| <i>Vibrio parahaemolyticus</i>      | <i>Vibrio parahaemolyticus</i> (ATCC 17802)                                                                                                                                                |

*Yersinia* spp

*Yersinia enterocolitica* (ATCC 23715)

*Yersinia pseudotuberculosis* (ATCC 6903)

---
